# Supplementary material for: Gender Differences in Physician Use of Social Media for Professional Advancement
Source: PubMed Central journal article supplement (PMC8120326; doi:10.1001/jamanetworkopen.2021.9834), 2021-05-13
Supplement: jamanetwopen-e219834-s001.pdf [file jamanetwopen-e219834-s001.pdf]

## Supplemental Online Content

Woitowich NC, Arora VM, Pendergrast T, Gottlieb M, Trueger NS, Jain S. Gender differences in physician use of social media for professional advancement. *JAMA Netw Open*. 2021;4(5):e219834. doi:10.1001/jamanetworkopen.2021.9834

### **eAppendix.** Anonymous Social Media Survey

This supplemental material has been provided by the authors to give readers additional information about their work.

# Anonymous Social Media Survey

Please complete the survey below.

Thank you!

**If you wish to participate, please click "Yes" next to the I Agree text, and you will be taken to the survey.**

**If you do not wish to participate in this study, please select "No" or select "X" in the corner of your browser.**

I agree:

- Yes  
 No

What is your age?

\_\_\_\_\_

Where are you from?

- United States  
 Puerto Rico  
 Canada  
 Australia  
 United Kingdom  
 Central America  
 South America  
 Africa  
 Asia  
 Mexico  
 Central America  
 Other

Please specify:

\_\_\_\_\_

---

Which state do you currently live in?

- Alabama
- Alaska
- Arizona
- Arkansas
- California
- Colorado
- Connecticut
- Delaware
- Florida
- Georgia
- Hawaii
- Idaho
- Illinois
- Indiana
- Iowa
- Kansas
- Kentucky
- Louisiana
- Maine
- Maryland
- Massachusetts
- Michigan
- Minnesota
- Mississippi
- Missouri
- Montana
- Nebraska
- Nevada
- New Hampshire
- New Jersey
- New Mexico
- New York
- North Carolina
- North Dakota
- Ohio
- Oklahoma
- Oregon
- Pennsylvania
- Rhode Island
- South Carolina
- South Dakota
- Tennessee
- Texas
- Utah
- Vermont
- Virginia
- Washington
- West Virginia
- Wisconsin
- Wyoming
- Washington DC

---

What is your race/ethnicity?

- White
- Black
- Asian
- American Indian/Native Alaskan
- Native Hawaiian
- Other
- Unknown
- I would prefer not to say

---

Please describe:

---

---

Do you identify as Hispanic/Latino?

- Yes
- No

---

How do you identify?

- Female
- Male
- Non-binary/third gender
- Prefer to self-describe
- Prefer not to say

---

Please specify:

---

---

Please select your relationship status:

- Single
- Married
- Partnered
- Divorced
- Other

---

Please describe:

---

---

What type of degree(s) do you hold?

- MD
- DO
- MBBS
- Other international medical doctorate
- Additional advanced degree

---

Please specify:

---

---

Please select the specialty you primarily practice in:

- Allergy and immunology
- Anesthesiology
- Aerospace medicine
- Cardiology
- Cardiothoracic surgery
- Child and adolescent psychiatry and psychotherapy
- Clinical neurophysiology
- Colon and Rectal Surgery
- Critical Care
- Dermatology
- Emergency medicine
- Endocrinology
- Family Medicine
- Gastroenterology
- General practice
- Geriatrics
- Obstetrics and gynaecology
- Health informatics
- Hospice and palliative medicine
- Infectious disease
- Internal medicine
- Internal medicine subspecialty not listed
- Interventional radiology
- Vascular medicine
- Nephrology
- Neurology
- Neurosurgery
- Nuclear medicine
- Occupational medicine
- Ophthalmology
- Orthodontics
- Orthopaedics
- Oral and maxillofacial surgery
- Otorhinolaryngology
- Pathology
- Pediatrics
- Pediatric cardiology
- Pediatric critical care
- Pediatric endocrinology and diabetes
- Pediatric gastroenterology, hepatology and nutrition
- Pediatric haematology and oncology
- Pediatric infectious diseases
- Pediatric Subspecialty not listed
- Neonatology
- Pediatric nephrology
- Pediatric respiratory medicine
- Paediatric rheumatology
- Pediatric surgery
- Physical medicine and rehabilitation
- reconstructive and aesthetic surgery
- Pulmonology
- Psychiatry
- Public Health
- Radiation Oncology
- Radiology
- Sports medicine
- Neuroradiology
- General surgery
- Surgical subspecialty not listed
- Urology
- Urogynecology
- Vascular surgery
- Other
- Medical Oncology
- Hematology
- Hematology/Oncology
- MedPeds

---

My specialty is:

---

Are you currently a medical student, resident, fellow, or other trainee?

- No  
 Yes, I am a Medical Student  
 Yes, I am a Resident  
 Yes, I am a Fellow  
 Yes, I am a Trainee (not listed)

---

Number of years in practice post-residency completed:

- 0-5  
 5-10  
 10-15  
 15-20  
 >20

---

Please select your primary work environment:

- Clinical care  
 Research  
 Education  
 Administration (i.e. division chief, department chair, assistant dean, medical director)  
 Industry  
 Government or non-profit  
 Other

---

Do you hold an academic faculty position?

- Yes  
 No

---

Please select which applies to you:

- Tenure track  
 Non-tenure track  
 I Don't know

---

What is your current faculty rank?

- Assistant Professor  
 Associate Professor  
 Full Professor  
 Clinical Instructor  
 Other

---

Please specify:

---



---

Do you use any or all of your legal (given) name on social media?

- Yes, only on my personal social media accounts  
 Yes, only on my professional social media accounts  
 Yes, on my both personal and professional social media accounts  
 No, I prefer to remain anonymous or use a pseudonym  
 Other

---

Please specify:

---



---

Do you list your employer/institutional affiliation on your social media accounts?

- Yes, my clinical affiliation  
 Yes, my academic affiliation  
 Yes, both my clinical and academic affiliation  
 Yes, something else  
 No, none

---

Please specify:

---

**Please indicate the amount of time you spend on social media per day:**

|                  | 0-30 min              | 30-60 min             | 1-3 hrs               | 3-5 hrs               | >5 hrs                |
|------------------|-----------------------|-----------------------|-----------------------|-----------------------|-----------------------|
| Professional Use | <input type="radio"/> | <input type="radio"/> | <input type="radio"/> | <input type="radio"/> | <input type="radio"/> |
| Personal Use     | <input type="radio"/> | <input type="radio"/> | <input type="radio"/> | <input type="radio"/> | <input type="radio"/> |

Why do you use social media (please select all that apply):

- Building my professional network  
 Building a support network among colleagues  
 Learning about new research  
 Learning about clinical topics  
 Share my work  
 Medical Education (eg creating blogs or podcasts)  
 Other

Please share your other reasons for using social media:

\_\_\_\_\_

**Please describe the impact social media has on your...**

|                             | Negative impact       | Slightly negative impact | No impact             | Slightly positive impact | Positive impact       |
|-----------------------------|-----------------------|--------------------------|-----------------------|--------------------------|-----------------------|
| interaction with patients   | <input type="radio"/> | <input type="radio"/>    | <input type="radio"/> | <input type="radio"/>    | <input type="radio"/> |
| interaction with colleagues | <input type="radio"/> | <input type="radio"/>    | <input type="radio"/> | <input type="radio"/>    | <input type="radio"/> |

**Please indicate if you agree with the following statements:**

**Social media has...**

|                                                                                                 | Strongly Agree        | Agree                 | Neutral               | Disagree              | Strongly disagree     |
|-------------------------------------------------------------------------------------------------|-----------------------|-----------------------|-----------------------|-----------------------|-----------------------|
| ...expanded or diversified my research portfolio                                                | <input type="radio"/> | <input type="radio"/> | <input type="radio"/> | <input type="radio"/> | <input type="radio"/> |
| ...increased my collaboration with individuals in different specialties                         | <input type="radio"/> | <input type="radio"/> | <input type="radio"/> | <input type="radio"/> | <input type="radio"/> |
| ...increased my collaboration with individuals at other institutions                            | <input type="radio"/> | <input type="radio"/> | <input type="radio"/> | <input type="radio"/> | <input type="radio"/> |
| ...influenced my decision to pursue a new or different career trajectory/led to a career change | <input type="radio"/> | <input type="radio"/> | <input type="radio"/> | <input type="radio"/> | <input type="radio"/> |
| ...helped me obtain a promotion                                                                 | <input type="radio"/> | <input type="radio"/> | <input type="radio"/> | <input type="radio"/> | <input type="radio"/> |
| ...improved my overall job satisfaction                                                         | <input type="radio"/> | <input type="radio"/> | <input type="radio"/> | <input type="radio"/> | <input type="radio"/> |
| ...directly led to a speaking opportunity or engagement                                         | <input type="radio"/> | <input type="radio"/> | <input type="radio"/> | <input type="radio"/> | <input type="radio"/> |
| ...resulted in a scholarship opportunity                                                        | <input type="radio"/> | <input type="radio"/> | <input type="radio"/> | <input type="radio"/> | <input type="radio"/> |

...increased my collaboration with individuals within my specialty

I generally think social media is a good thing for me as a medical professional

- Strongly Agree
- Agree
- Agree somewhat
- Neutral
- Disagree somewhat
- Disagree
- Strongly disagree

**How do you use the following social media platforms?**

|           | Personal Use Only     | Professional Use Only | Professional and Personal use | I do not use this     |
|-----------|-----------------------|-----------------------|-------------------------------|-----------------------|
| Facebook  | <input type="radio"/> | <input type="radio"/> | <input type="radio"/>         | <input type="radio"/> |
| Flickr    | <input type="radio"/> | <input type="radio"/> | <input type="radio"/>         | <input type="radio"/> |
| Instagram | <input type="radio"/> | <input type="radio"/> | <input type="radio"/>         | <input type="radio"/> |
| LinkedIn  | <input type="radio"/> | <input type="radio"/> | <input type="radio"/>         | <input type="radio"/> |
| Snapchat  | <input type="radio"/> | <input type="radio"/> | <input type="radio"/>         | <input type="radio"/> |
| Tumblr    | <input type="radio"/> | <input type="radio"/> | <input type="radio"/>         | <input type="radio"/> |
| Twitter   | <input type="radio"/> | <input type="radio"/> | <input type="radio"/>         | <input type="radio"/> |
| Youtube   | <input type="radio"/> | <input type="radio"/> | <input type="radio"/>         | <input type="radio"/> |
| Doximity  | <input type="radio"/> | <input type="radio"/> | <input type="radio"/>         | <input type="radio"/> |
| Blogs     | <input type="radio"/> | <input type="radio"/> | <input type="radio"/>         | <input type="radio"/> |
| Reddit    | <input type="radio"/> | <input type="radio"/> | <input type="radio"/>         | <input type="radio"/> |
| Podcasts  | <input type="radio"/> | <input type="radio"/> | <input type="radio"/>         | <input type="radio"/> |

Are you a member of social media group specifically for physicians (e.g. facebook groups such as Physician Mom Group, Doctors on Social Media, Dual Physician Families)?

- Yes
- No
- Other
- Unsure
- Not applicable

Please specify other:

\_\_\_\_\_

Are you a member of a social media group specific to your specialty/subspecialty?

- Yes
- No
- Other
- Unsure
- Not applicable

Please specify other:

\_\_\_\_\_

Are you a member of a social media group specific to your gender?

- Yes
- No
- Other
- Unsure
- Not applicable



Please specify:

---

How do you share your social media contact information (e.g. blog URL, Twitter handle)?

- Email signature
- Business cards
- Lecture slides
- Other
- I don't use social media

Please specify:

---

**I am concerned my use of social media can have negative impact on my...**

|                                                                | Strongly disagree     | Disagree              | Neutral               | Agree                 | Strongly agree        |
|----------------------------------------------------------------|-----------------------|-----------------------|-----------------------|-----------------------|-----------------------|
| ...time management                                             | <input type="radio"/> | <input type="radio"/> | <input type="radio"/> | <input type="radio"/> | <input type="radio"/> |
| ...supervisors' or institutions' perceptions of me and my work | <input type="radio"/> | <input type="radio"/> | <input type="radio"/> | <input type="radio"/> | <input type="radio"/> |

**Please note that the following questions contain content regarding sexual harassment.**

Have you ever been personally targeted or attacked on social media?

- Yes
- No

If you desire, please provide more information about instances of personal targeting on social media:

---

Have you ever been sexually harassed on social media?

- Yes
- No

If you desire, please provide more information about the instances of harassment:

---

**The following items are free-response.**

Please describe how you think social media has had a positive impact on your overall life:

---

Please describe how you think social media has had a positive impact on your career:

---

Please describe how you think social media has had a negative impact on your overall life:

---

Please describe how you think social media has had a negative impact on your career:

---

---

What do you hope to get out of social media?

---

---

Where did you hear about this survey?

- Twitter
- Facebook
- Instagram
- LinkedIn
- Snapchat
- Doximity
- Podcasts
- Blogs
- Youtube
- Reddit
- Other

---

Please specify:

---
